# Supplementary material
Source: PubMed Central journal article supplement (PMC4719779)
Supplement: NIHMS743440-supplement-003197_-_Supplemental_Material.pdf [file NIHMS743440-supplement-003197_-_Supplemental_Material.pdf]

## SUPPLEMENTAL MATERIAL

### Supplemental Methods

#### ***Quantitative reverse transcriptase-polymerase chain reaction (qRT-PCR)***

For left atrial and differentiated cardiomyocyte knockdown samples, 12.5 µl of the TaqMan® gene expression master mix (Applied Biosystems), 1.25 µl of the custom designed PANCR or PITX2c primer/probe set (Supplemental Table 1, obtained from IDT) and the primer limited cardiac actin (ACTC1) primer/probe mix (assay number Hs00606316\_m1 from Applied Biosystems) were mixed to create a master mix to be added to each sample. For the time course of H9 cell differentiation into cardiomyocytes and tissue array comparison, a similar qRT-PCR assay was done, but normalized to cyclophilin A (PPIA, assay number Hs04194521\_s1 from Applied Biosystems) instead of ACTC1, since the latter gene is not expressed in undifferentiated H9 cells or most other tissues. This 15 µl master mix was pipetted into individual wells of a 96-well working plate. 10 µl of the diluted cDNA was added to each well. 5 µl of this working mixture was pipetted in triplicate to a 384-well assay plate. Real time PCR was performed in a Bio-RAD CRX thermocycler that had been calibrated for FAM and VIC fluorescent probes. Thermal cycling was performed with a hot-start at 95°C for 10 minutes, followed by 40 cycles of 95°C for 15 seconds and 60°C for 60 seconds.

#### ***RNAseq and analysis***

RNAseq library preparation and sequencing for differentiated H9 cardiomyocytes was completed at the University of Chicago using the Illumina HiSeq platform. The 100 bp paired-end reads were aligned to hg19 using STAR aligner<sup>1</sup> and the Ensembl 71 transcript annotation.<sup>2</sup> Read counts were summed using htseq-counts. Gene ontology searches for the genes regulated by *PANCR* or *PITX2c* knockdown was performed using DAVID.<sup>3,4</sup> Differential gene expression analyses after *PANCR* and *PITX2c* knockdown was performed using the

edgeR<sup>5</sup> package in R/Stats. Small RNAseq of differentiated H9 cardiomyocytes was performed at the Cleveland Clinic on the Illumina MySeq platform. Sequences were aligned to the genome using STAR aligner<sup>1</sup> and the transcript counts were determined using FeatureCounts.<sup>6</sup> miRNA families were collapsed to a single miRNA family identifier using the miRbase annotations, thus discarding sequences that were not annotated miRNAs. Differential miRNA gene expression was determined using DEXSeq software.<sup>7</sup> False discovery rates were determined by the Benjamini Hochberg method<sup>8</sup> in the DEXSeq package.

### References:

1. Dobin A, Davis CA, Schlesinger F, Drenkow J, Zaleski C, Jha S, Batut P, Chaisson M, Gingeras TR. STAR: Ultrafast universal RNA-seq aligner. *Bioinformatics*. 2013;29:15-21.
2. Flicek P, Ahmed I, Amode MR, Barrell D, Beal K, Brent S, Carvalho-Silva D, Clapham P, Coates G, Fairley S. Ensembl 2013. *Nucleic Acids Res*. 2013;41:D48-D55.
3. Huang da W, Sherman BT, Lempicki RA. Bioinformatics enrichment tools: Paths toward the comprehensive functional analysis of large gene lists. *Nucleic Acids Res*. 2009;37:1-13.
4. Huang DW, Sherman BT, Lempicki RA. Systematic and integrative analysis of large gene lists using DAVID bioinformatics resources. *Nature protocols*. 2008;4:44-57.
5. Robinson M, McCarthy D, Smyth G. edgeR: a Bioconductor package for differential expression analysis of digital gene expression data. *Bioinformatics*. 2010;26:139-140.
6. Liao Y, Smyth GK, Shi W. featureCounts: An efficient general purpose program for assigning sequence reads to genomic features. *Bioinformatics*. 2014;30:923-930.

7. Anders S, Reyes A, Huber W. Detecting differential usage of exons from RNA-seq data.

*Genome Res.* 2012;22:2008-2017.

8. Benjamini Y, Hochberg Y. Controlling the false discovery rate: A practical and powerful approach to multiple testing. *Journal of the Royal Statistical Society. Series B (Methodological)*. 1995;57:289-300.

**Supplemental Table 1: PANC1 TaqMan primers/probe and siRNA sequences**

| Identifier            | Sequence                                                       |
|-----------------------|----------------------------------------------------------------|
| PANC1 Forward Primer  | 5' AAT TCT CCA TAG GAC TGC ATG AG-3'                           |
| PANC1 Reverse Primer  | 5'-CAC CTC GGT TCC ACT CAA C-3'                                |
| TaqMan Probe          | 5'-/56-FAM/CGG TTG TCT /ZEN/TCT CCC AGA ATG AGT GA/3IABkFQ/-3' |
| PANC1 siRNA sense     | 5' CGG UUC CAC UCA ACC GAU UUU 3'                              |
| PANC1 siRNA antisense | 5' AAU CGG UUG AGU GGA ACC GUU 3'                              |

\* FAM fluorophore with internal ZEN and 3' IOWA BLACK FQ quencher modification

**Supplemental table 2. Top 20 differentially expressed genes after PANCR knockdown, by fold change.**

| Gene symbol     | Chromosome | log <sub>2</sub> FC* | logCPM <sup>†</sup> | P value <sup>‡</sup> |
|-----------------|------------|----------------------|---------------------|----------------------|
| SERPINA7        | X          | 5.86                 | -1.91               | 2.19E-04             |
| FGFBP2          | 4          | 4.87                 | -1.52               | 5.99E-04             |
| PLG             | 6          | 3.44                 | -0.68               | 6.53E-03             |
| PRODH2          | 19         | -2.89                | -1.25               | 2.27E-04             |
| EMX1            | 2          | -2.80                | -1.46               | 4.45E-03             |
| ENSG00000233639 | 2          | 2.69                 | -1.47               | 7.71E-02             |
| ENSG00000248362 | 5          | 2.69                 | -1.07               | 2.53E-05             |
| ANGPT4          | 20         | -2.65                | -0.01               | 1.51E-03             |
| ITIH1           | 3          | 2.65                 | -0.96               | 4.40E-02             |
| OR51E2          | 11         | -2.58                | -0.40               | 1.82E-03             |
| FABP1           | 2          | 2.53                 | -1.40               | 1.23E-02             |
| SCNN1G          | 16         | -2.47                | 2.03                | 1.18E-02             |
| RPSAP56         | 16         | 2.47                 | -0.60               | 1.61E-02             |
| CD300E          | 17         | -2.41                | -1.81               | 3.69E-02             |
| ENSG00000258123 | 12         | 2.41                 | -1.76               | 1.26E-04             |
| SST             | 3          | -2.37                | 0.80                | 5.04E-03             |
| PHOX2A          | 11         | 2.29                 | -1.67               | 1.26E-03             |
| ENSG00000261286 | 16         | 2.29                 | -1.47               | 5.31E-04             |
| OR51E1          | 11         | -2.28                | -1.10               | 1.99E-02             |
| ST3GAL6-AS1     | 3          | 2.28                 | -1.65               | 9.34E-04             |

\*; Log2 fold change relative to scramble siRNA

†, log read counts per million

‡, t-test p-value determined by edgeR software comparing PANCR knockdown vs. scrambled siRNA

**Supplemental table 3. Top 20 differentially expressed genes after PITX2c knockdown, by fold change**

| Gene symbol     | Chromosome | log <sub>2</sub> FC* | logCPM <sup>†</sup> | P value <sup>‡</sup> |
|-----------------|------------|----------------------|---------------------|----------------------|
| CST1            | 20         | 8.44                 | -1.414              | 1.94E-05             |
| KRT6A           | 12         | -4.47                | -1.270              | 9.97E-03             |
| EOMES           | 3          | 3.28                 | -0.845              | 8.54E-03             |
| SERPINA7        | X          | 3.16                 | -1.911              | 7.22E-02             |
| CHRD2           | 11         | -3.15                | 0.790               | 1.43E-04             |
| OR51E1          | 11         | -3.02                | -1.097              | 3.15E-03             |
| PLG             | 6          | 2.92                 | -0.677              | 2.01E-02             |
| LINC00461       | 5          | -2.90                | 1.675               | 1.31E-01             |
| CD300E          | 17         | -2.60                | -1.812              | 2.65E-02             |
| ENSG00000228741 | 13         | -2.43                | -1.481              | 3.60E-03             |
| CER1            | 9          | 2.42                 | -0.178              | 2.24E-03             |
| SCGB3A2         | 5          | 2.40                 | -1.901              | 1.30E-03             |
| TMPRSS3         | 21         | 2.39                 | -1.656              | 1.32E-03             |
| SST             | 3          | -2.38                | 0.800               | 4.83E-03             |
| ENSG00000261286 | 16         | 2.35                 | -1.470              | 3.73E-04             |
| FAM179A         | 2          | -2.30                | -1.695              | 9.55E-03             |
| ANGPT4          | 20         | -2.30                | -0.009              | 5.12E-03             |
| POU5F1          | 6          | 2.30                 | -1.371              | 1.48E-01             |
| HOXB8           | 17         | -2.29                | -0.967              | 5.38E-03             |
| CMKLR1          | 12         | -2.26                | 2.585               | 1.00E-03             |

\*; Log2 fold change relative to scramble siRNA

†, log read counts per million

‡, t-test p-value determined by edgeR software comparing PITX2c knockdown vs. scrambled siRNA

**Supplemental table 4. Top 20 differentially expressed miRNA families after PANCR knockdown, by p-value**

| miR family | Read counts <sup>*</sup> | log <sub>2</sub> FC <sup>†</sup> | P value <sup>‡</sup> | FDR <sup>§</sup> |
|------------|--------------------------|----------------------------------|----------------------|------------------|
| MIR423     | 4481                     | 1.42                             | 3.28E-10             | 4.41E-08         |
| MIR501     | 169                      | 1.68                             | 1.34E-09             | 1.35E-07         |
| MIR500A    | 1313                     | 1.64                             | 1.65E-08             | 1.17E-06         |
| MIR191     | 31516                    | -0.94                            | 1.75E-08             | 1.17E-06         |
| MIR589     | 154                      | 1.19                             | 3.99E-08             | 2.29E-06         |
| MIR126     | 2116                     | -1.10                            | 1.38E-07             | 6.96E-06         |
| MIR29A     | 44                       | 1.86                             | 2.57E-07             | 1.15E-05         |
| MIR151B    | 124                      | 1.14                             | 1.26E-06             | 4.61E-05         |
| MIR99A     | 1116                     | -1.22                            | 2.10E-06             | 6.50E-05         |
| MIR140     | 1003                     | 0.80                             | 3.24E-06             | 9.33E-05         |
| MIR720     | 4                        | 3.94                             | 7.60E-06             | 2.04E-04         |
| MIR542     | 320                      | -0.69                            | 1.81E-05             | 4.47E-04         |
| MIR143     | 307561                   | 1.14                             | 1.88E-05             | 4.47E-04         |
| MIR490     | 1767                     | -0.58                            | 3.01E-05             | 6.74E-04         |
| MIR532     | 1593                     | 1.02                             | 1.12E-04             | 2.35E-03         |
| MIR194-1   | 176                      | -0.96                            | 1.17E-04             | 2.35E-03         |
| MIR301A    | 1896                     | -1.03                            | 1.29E-04             | 2.48E-03         |
| MIR194-2   | 186                      | -0.93                            | 1.52E-04             | 2.71E-03         |
| MIR30B     | 2873                     | -0.55                            | 1.54E-04             | 2.71E-03         |

<sup>\*</sup>, Read counts per group, quantile normalized

<sup>†</sup>, Log<sub>2</sub> fold change relative to scramble siRNA

<sup>‡</sup>, t-test p-value determined by DESseq software comparing PANCR knockdown vs. scrambled siRNA.

<sup>§</sup>, false discovery rate for testing multiple miRNA families (type II error) implemented in DEXSeq<sup>6,7</sup>.

**Supplemental table 5. Top 20 differentially expressed miRNA families after PITX2c knockdown, by p-value**

| miR family | Read counts <sup>*</sup> | log <sub>2</sub> FC <sup>†</sup> | P value <sup>‡</sup> | FDR <sup>§</sup> |
|------------|--------------------------|----------------------------------|----------------------|------------------|
| MIR301B    | 933                      | -1.23                            | 2.34E-05             | 1.90E-03         |
| MIR302A    | 566                      | -0.74                            | 8.81E-05             | 3.53E-03         |
| MIR328     | 178                      | -0.80                            | 9.77E-05             | 3.53E-03         |
| MIR941-1   | 33                       | 2.03                             | 5.90E-05             | 3.53E-03         |
| MIRLET7F1  | 1494                     | 0.86                             | 9.23E-05             | 3.53E-03         |
| MIRLET7F2  | 1519                     | 0.86                             | 9.24E-05             | 3.53E-03         |
| MIR301A    | 1896                     | -1.04                            | 1.11E-04             | 3.59E-03         |
| MIR126     | 2116                     | -0.75                            | 3.14E-04             | 8.50E-03         |
| MIR143     | 307561                   | 0.96                             | 3.03E-04             | 8.50E-03         |
| MIR30B     | 2873                     | -0.52                            | 3.57E-04             | 8.93E-03         |
| MIRLET7G   | 476                      | 0.85                             | 4.85E-04             | 1.13E-02         |
| MIR182     | 44768                    | 1.37                             | 7.92E-04             | 1.72E-02         |
| MIR140     | 1003                     | 0.57                             | 8.51E-04             | 1.73E-02         |
| MIR302D    | 279                      | -0.77                            | 1.36E-03             | 2.32E-02         |
| MIR589     | 154                      | 0.69                             | 1.35E-03             | 2.32E-02         |
| MIR222     | 1099                     | 0.89                             | 1.74E-03             | 2.84E-02         |
| MIR191     | 31516                    | -0.52                            | 2.03E-03             | 3.15E-02         |
| MIRLET7I   | 159                      | 0.88                             | 2.47E-03             | 3.65E-02         |
| MIR423     | 4481                     | 0.68                             | 2.76E-03             | 3.80E-02         |

<sup>\*</sup>, Read counts per group, quantile normalized.

<sup>†</sup>, Log<sub>2</sub> fold change relative to scramble siRNA.

<sup>‡</sup>, t-test p-value determined by DESseq software comparing PITX2c knockdown vs. scrambled siRNA.

<sup>§</sup>, false discovery rate for testing multiple miRNA families (type II error) implemented in DEXSeq<sup>6,7</sup>.



Supplemental Figure 1

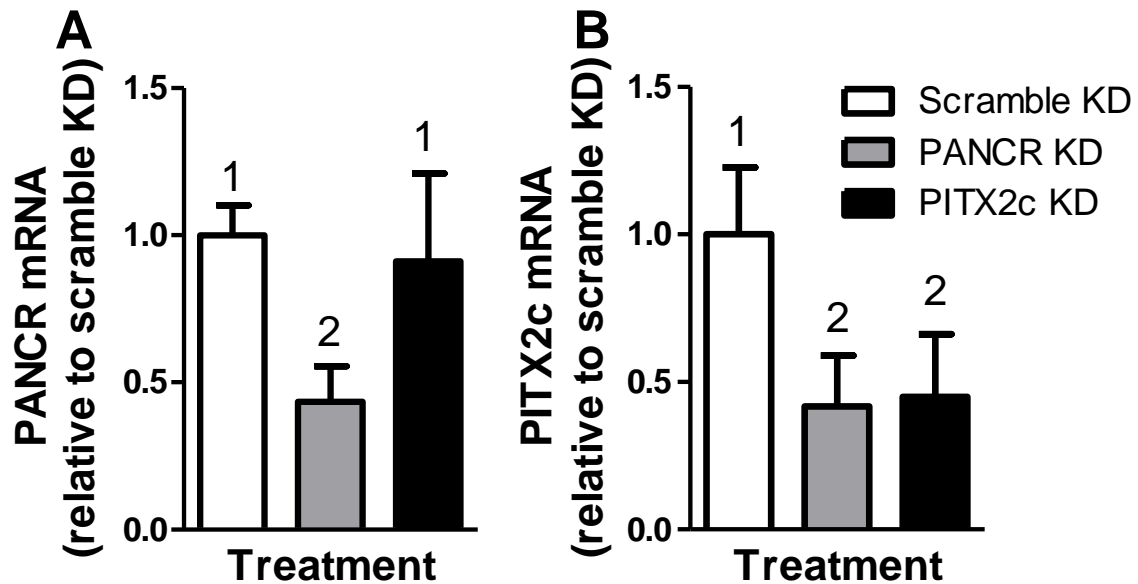

**Supplemental Figure 1: siRNA knockdown of PANCRA and PITX2c in differentiated cardiomyocytes.** qPCR was used to measure PANCRA (A) and PITX2c (B) expression levels after indicated siRNA treatments ( $N = 4 \pm SD$ , different numbers above bars indicate  $p < 0.05$  by ANOVA with Newman-Keuls posttest). ACTC1 qPCR was used for internal normalization, the  $2^{-\Delta\Delta CT}$  method was used for adjusting values to a linear scale, and expression was then shown relative to expression in the scramble KD control.
